# Structural analysis of SARS-CoV-2 and predictions of the human interactome

Andrea Vandelli<sup>1,2</sup>, Michele Monti<sup>1,3</sup>, Edoardo Milanetti<sup>4,5</sup>, Riccardo Delli Ponti<sup>6,\*</sup>  
and Gian Gaetano Tartaglia<sup>1,3,5,7,\*</sup>

<sup>1</sup> Centre for Genomic Regulation (CRG), The Barcelona Institute for Science and Technology, Dr. Aiguader 88, 08003 Barcelona, Spain and Universitat Pompeu Fabra (UPF), 08003 Barcelona, Spain

<sup>2</sup> Systems Biology of Infection Lab, Department of Biochemistry and Molecular Biology, Biosciences Faculty, Universitat Autònoma de Barcelona, 08193 Cerdanyola del Vallès, Spain

<sup>3</sup> RNA System Biology Lab, department of Neuroscience and Brain Technologies, Istituto Italiano di Tecnologia, Via Morego 30, 16163, Genoa, Italy.

<sup>4</sup> Department of Physics, Sapienza University, Piazzale Aldo Moro 5, 00185, Rome, Italy

<sup>5</sup> Center for Life Nanoscience, Istituto Italiano di Tecnologia, Viale Regina Elena 291, 00161, Rome, Italy

<sup>4</sup> Department of Biology 'Charles Darwin', Sapienza University of Rome, P.le A. Moro 5, Rome 00185, Italy

<sup>6</sup> School of Biological Sciences, Nanyang Technological University, 60 Nanyang Drive, Singapore, 637551, Singapore

<sup>7</sup> Institutio Catalana de Recerca i Estudis Avançats (ICREA), 23 Passeig Lluís Companys, 08010 Barcelona, Spain

\*to whom correspondence should be addressed to: [riccardo.ponti@ntu.edu.sg](mailto:riccardo.ponti@ntu.edu.sg) (RDP) and [giangaetano.tartaglia@uniroma1.it](mailto:giangaetano.tartaglia@uniroma1.it) or [gian.tartaglia@iit.it](mailto:gian.tartaglia@iit.it) (GGT)

## ABSTRACT

We calculated the structural properties of >2500 coronaviruses and computed >100000 human protein interactions with severe acute respiratory syndrome coronavirus 2 (SARS-CoV-2). Using the *CROSS* method, we found that the SARS-CoV-2 region encompassing nucleotides 23000 - 24000 is highly conserved at the structural level, while the region upstream varies significantly.

These two sequences are important for viral infection as they code for a domain of the viral protein Spike S interacting with the human receptor angiotensin-converting enzyme 2 (ACE2) and, in the close homologue from Middle East respiratory syndrome coronavirus (MERS-CoV), sialic acids.

We predict highly structured regions at the 5' and 3' where our calculations indicate strong propensity to bind to human proteins involved in viral replication. Using the *cat*RAPID method, we identified that the 5' interacts with double-stranded RNA-specific editase 1 ADARB1, 2-5A-

A. Vandelli et al. Structure and interactions of SARS-CoV-2

36 dependent ribonuclease RNASEL, ATP-dependent RNA helicase DDX1 and A-kinase anchor  
37 protein 8-like AKAP8L, in addition to >10 high-confidence candidate partners. These interactions,  
38 also implicated in HIV replication, should be further investigated for a better understanding of host-  
39 virus interaction mechanisms.

40  
41

42 **INTRODUCTION**

43

44 A novel disease named Covid-19 by the World Health Organization and caused by the severe acute  
45 respiratory syndrome coronavirus 2 (SARS-CoV-2) has been recognized as responsible for the  
46 pneumonia outbreak that started in December, 2019 in Wuhan City, Hubei, China <sup>1</sup> and spread in  
47 February to Milan, Lombardy, Italy <sup>2</sup> becoming pandemic. As of April 2020, the virus infected  
48 >1'000'000 people in more than 200 countries.

49

50 SARS-CoV-2 is a positive-sense single-stranded RNA virus that shares similarities with other beta-  
51 coronavirus such as severe acute respiratory syndrome coronavirus (SARS-CoV) and Middle East  
52 respiratory syndrome coronavirus (MERS-CoV) <sup>3</sup>. Bats have been identified as the primary host for  
53 SARS-CoV and SARS-CoV-2 <sup>4,5</sup> but the intermediate host linking SARS-CoV-2 to humans is still  
54 unknown, although a recent report indicates that pangolins could be involved <sup>6</sup>.

55

56 Coronaviruses use species-specific regions to mediate the entry in the host cell and SARS-CoV,  
57 MERS-CoV and SARS-CoV-2, the spike S protein activates the infection in human respiratory  
58 epithelial cells <sup>7</sup>. Spike S is assembled as a trimer and contains around 1,300 amino acids within  
59 each unit <sup>8</sup>. In the S' region of the protein, the receptor binding domain (RBD), which contains  
60 around 300 amino acids, mediates the binding with angiotensin-converting enzyme, (ACE2)  
61 attacking respiratory cells. Another region upstream of the RBD, present in MERS-CoV but not in  
62 SARS-CoV, is involved in the adhesion to sialic acid and could play a key role in regulating viral  
63 infection <sup>7,9</sup>.

64

65 At present, very few molecular details are available on SARS-CoV-2 and its interactions with  
66 human host, which are mediated by specific RNA elements <sup>10</sup>. To study the RNA structural  
67 content, we used *CROSS* <sup>11</sup> that was previously developed to investigate large transcripts such as the  
68 human immunodeficiency virus HIV-1 <sup>12</sup>. *CROSS* predicts the structural profile (single- and double-  
69 stranded state) at single-nucleotide resolution using sequence information only. We performed

A. Vandelli et al. Structure and interactions of SARS-CoV-2

70 sequence and structural alignments among 62 SARS-CoV-2 strains and identified the conservation  
71 of specific elements in the spike S region, which provide clues on the evolution of domains  
72 involved in the binding to ACE2 and sialic acid.

73

74 As highly structured regions of RNA molecules have strong propensity to form stable contacts with  
75 proteins<sup>13</sup> and promote assembly of specific complexes<sup>14,15</sup>, SARS-CoV-2 domains enriched in  
76 double-stranded content are expected to establish interactions within host cells that are important to  
77 replicate the virus. To investigate the interactions potential of SARS-CoV-2 RNA with human  
78 proteins, we employed *catRAPID*<sup>16,17</sup>. *catRAPID*<sup>18</sup> estimates the binding potential of protein and  
79 RNA molecules through van der Waals, hydrogen bonding and secondary structure propensities of  
80 allowing identification of interaction partners with high confidence<sup>19</sup>. The unbiased analysis of  
81 more than 100000 protein interactions with SARS-CoV-2 RNA reveals that the 5' of SARS-CoV-  
82 2 has strong propensity to bind to human proteins involved in viral infection and especially reported  
83 to be associated with HIV infection. A comparison between SARS-CoV and HIV reveals indeed  
84 similarities<sup>20</sup>, but the relationship between SARS-CoV-2 and HIV is still unexplored.  
85 Interestingly, HIV and SARS-CoV-2, but not SARS-CoV nor MERS-CoV, have a furin-cleavage  
86 site occurs in the spike S protein, which could explain the spread velocity of SARS-CoV-2  
87 compared to SARS-CoV and MERS-CoV<sup>21,22</sup>. Yet, many processes related to SARS-CoV-2  
88 replication are unknown and our study aims to suggest relevant protein interactions for further  
89 investigation.

90

91 We hope that our large-scale calculations of structural properties and binding partners of SARS-  
92 CoV-2 will be useful to identify the mechanisms of virus replication within the human host.

93

## 94 **RESULTS**

95

### 96 **SARS-CoV-2 contains highly structured elements**

97

98 Structural elements within RNA molecules attract proteins<sup>13</sup> and reveal regions important for  
99 interactions with the host<sup>23</sup>.

100

101 To analyze SARS-CoV-2 (reference Wuhan strain MN908947), we employed *CROSS*<sup>11</sup> that  
102 predicts the double- and single-stranded content of large transcripts such as *Xist* and HIV-1<sup>12</sup>. We  
103 found the highest density of double-stranded regions in the 5' (nucleotides 1-253), membrane M

A. Vandelli et al. Structure and interactions of SARS-CoV-2

104 protein (nucleotides 26523-27191), spike S protein (nucleotides 23000-24000), and nucleocapsid N  
105 protein (nucleotides 2874-29533; **Fig. 1**)<sup>24</sup>. The lowest density of double-stranded regions were  
106 observed at nucleotides 6000-6250 and 20000-21500 and correspond to the regions between the  
107 non-structural proteins nsp14 and nsp15 and the upstream region of the spike surface protein S (**Fig.**  
108 **1**)<sup>24</sup>. In addition to the maximum corresponding to nucleotides 23000-24000, the structural content  
109 of spike S protein shows minima at around nucleotides 20500 and 24500 (**Fig. 1**).

110 We used the *Vienna* method<sup>25</sup> to further investigate the RNA secondary structure of specific  
111 regions identified with *CROSS*<sup>12</sup>. Employing a 100 nucleotide window centered around *CROSS*  
112 maxima and minima, we found good match between *CROSS* scores and Vienna free energies (**Fig.**  
113 **1**). Strong agreement is also observed between *CROSS* and *Vienna* positional entropy, indicating  
114 that regions with the highest structural content have also the lowest structural diversity.

115

116 Our analysis suggests presence of structural elements in SARS-CoV-2 that have evolved to interact  
117 with specific human proteins<sup>10</sup>. Our observation is based on the assumption that structured regions  
118 have an intrinsic propensity to recruit proteins<sup>13</sup>, which is supported by the fact that structured  
119 transcripts act as scaffolds for protein assembly<sup>14,15</sup>.

120

121

122 **Structural comparisons reveal that the spike S region of SARS-CoV-2 is conserved among**  
123 **coronaviruses**

124

125 We employed *CROSSalign*<sup>12</sup> to study the structural conservation of SARS-CoV-2 in different  
126 strains (**Materials and Methods**).

127

128 In this analysis, we compared the Wuhan strain MN908947 with around 2800 other coronaviruses  
129 (data from NCBI) having as host human (**Fig. 2**) or other species (**Supp. Fig. 1**). When comparing  
130 SARS-CoV-2 with human coronaviruses (1387 strains, including SARS-CoV and MERS-CoV), we  
131 found that the most conserved region falls inside the spike S genomic locus (**Fig. 2**). More  
132 precisely, the conserved region is between nucleotides 23000 - 24000 and exhibits an intricate and  
133 stable secondary structure (*RNAfold* minimum free energy = -269 kcal/mol)<sup>25</sup>. High conservation of  
134 a structured regions suggests a functional activity that might be relevant for host infection.

135

136 While the 3' and 5' of SARS-CoV-2 were shown to be relatively conserved in some beta-  
137 coronavirus<sup>10</sup>, they are highly variable in the entire set. However, the 3' and 5' are more structured

A. Vandelli *et al.* Structure and interactions of SARS-CoV-2

138 in SARS-CoV-2 than other coronaviruses (average structural content for SARS-CoV-2 = 0.56 in the  
139 5' and 0.49 in the 3'; other coronaviruses 0.49 in the 5' and 0.42 in the 3').

140

141

142 **Sequence and structural comparisons among SARS-CoV-2 strains indicate conservation of**  
143 **the ACE2 binding site and high variability in a region potentially interacting with sialic acids.**

144

145 To better investigate the sequence conservation of SARS-CoV-2, we compared 62 strains isolated  
146 from different countries during the pandemic (including China, USA, Japan, Taiwan, India, Brazil,  
147 Sweden, and Australia; data from NCBI and in VIPR [www.viprbrc.org](http://www.viprbrc.org); **Materials and Methods**).  
148 Our analysis aims to determine the relationship between structural content and sequence  
149 conservation.

150

151 Using *Clustal W* for multiple sequence alignments<sup>26</sup>, we observed general conservation of the  
152 coding regions with several *minima* in correspondence to areas between genes (**Fig. 3A**). One  
153 highly conserved region is between nucleotides 23000 - 24000 in the spike S genomic locus, while  
154 sequences up- and down-stream are variable (**Fig. 3A**). We then used *CROSSalign*<sup>12</sup> to compare  
155 the structural content (**Materials and Methods**). High variability of structure is observed for both  
156 the 5' and 3' and for nucleotides between 21000 - 22000 as well as 24000 - 25000, associated with  
157 the S region (red bars in **Fig. 3A**). The rest of the regions are significantly conserved at a structural  
158 level (p-value < 0.0001; Fisher's test).

159

160 We then compared protein sequences coded by the spike S genomic locus (NCBI reference  
161 QHD43416) and found that both sequence (**Fig. 3A**) and structure (**Fig. 2**) of nucleotides 23000 -  
162 24000 are highly conserved. The region corresponds to amino acids 330-500 that contact the host  
163 receptor angiotensin-converting enzyme 2 (ACE2)<sup>27</sup> promoting infection and provoking lung injury  
164<sup>22,28</sup>. By contrast, the region upstream of the binding site receptor ACE2 and located in  
165 correspondence to the minimum of the structural profile at around nucleotides 22500-23000 (**Fig. 1**)  
166 is highly variable<sup>29</sup>, as calculated with *Tcoffee* multiple sequence alignments<sup>29</sup> (**Fig. 3A**). This part  
167 of the spike S region corresponds to amino acids 243-302 that in MERS-CoV binds to sialic acids  
168 regulating infection through cell-cell membrane fusion (**Fig. 3B**; see related manuscript by E.  
169 Milanetti *et al.* "In-Silico evidence for two receptors based strategy of SARS-CoV-2")<sup>9,30,31</sup>.

170

A. Vandelli et al. Structure and interactions of SARS-CoV-2

171 Our analysis suggests that the structural region between nucleotides 23000 and 24000 of Spike S  
172 region is conserved among coronaviruses (**Fig. 2**) and the binding site for ACE2 has poor variation  
173 in human SARS-CoV-2 strains (**Fig. 3B**). By contrast, the region upstream, potentially involved in  
174 adhesion to sialic acids, has almost poor structural content and varies significantly in the human  
175 population (**Fig. 3B**).

176

177 **Analysis of human interactions with SARS-CoV-2 identifies proteins involved in viral**  
178 **replication and HIV infection**

179

180 In order to obtain insights on how the virus is replicated in human cells, we predicted SARS-CoV-2  
181 interactions with the whole RNA-binding human proteome. Following a protocol to study structural  
182 conservation in viruses<sup>12</sup>, we first divided the Wuhan sequence in 30 fragments of 1000 nucleotides  
183 each moving from the 5' to 3' and then calculated the protein-RNA interactions of each fragment  
184 with *catRAPID omics* (3340 canonical and non-canonical RNA-binding proteins, or RBPs, for a  
185 total 102000 interactions)<sup>16</sup>. Proteins such as PTBP1 showed the highest interaction propensity (or  
186 Z-score; **Materials and Methods**) at the 5' while others such as HNRNPQ showed the highest  
187 interaction propensity at the 3', in agreement with previous studies on coronaviruses<sup>32</sup>.

188

189 For each fragment, we predicted the most significant interactions by filtering according to the Z  
190 score. We used three different thresholds in ascending order of stringency:  $Z \geq 1.50$ , 1.75 and 2  
191 respectively. Importantly, we removed from the list proteins that were predicted to interact  
192 promiscuously with different fragments. Fragment 1 corresponds to the 5' and is the most  
193 contacted by RBPs (around 120 with  $Z \geq 2$  high-confidence interactions; **Fig. 4A**), which is in  
194 agreement with the observation that highly structured regions attract a large number of proteins<sup>13</sup>.  
195 Indeed, the 5' contains a leader sequence and the untranslated region with multiple stem loop  
196 structures that control RNA replication and transcription<sup>33,34</sup>.

197

198 The interactome of each fragment was then analysed using *cleverGO*, a tool for GO enrichment  
199 analysis<sup>35</sup>. Proteins interacting with fragments 1, 2 and 29 were associated with annotations related  
200 to viral processes (**Fig. 4B**; **Supp. Table 1**). Considering the three thresholds applied (**Materials**  
201 **and Methods**), we found 22 viral proteins for fragment 1, 2 proteins for fragment 2 and 11 proteins  
202 for fragment 29 (**Fig. 4C**).

203

A. Vandelli et al. Structure and interactions of SARS-CoV-2

204 Among the high-confidence interactors of fragment 1, we discovered RBPs involved in positive  
205 regulation of viral processes and viral genome replication, such as double-stranded RNA-specific  
206 editase 1 ADARB1 (Uniprot P78563<sup>36</sup>) and 2-5A-dependent ribonuclease RNASEL (Q05823). We  
207 also identified proteins related to the establishment of integrated proviral latency, including X-ray  
208 repair cross-complementing protein 5 XRCC5 (P13010) and X-ray repair cross-complementing  
209 protein 6 XRCC6 (P12956; **Fig. 4D**).

210  
211 Importantly, we found proteins related to defence response to viruses, such as ATP-dependent RNA  
212 helicase DDX1 (Q92499), are involved in the negative regulation of viral genome replication. Some  
213 proteins are listed as DNA binding proteins such as Cyclin-T1 CCNT1 (Uniprot code O60563<sup>36</sup>),  
214 Zinc finger protein 175 ZNF175 (Q9Y473), while Prospero homeobox protein 1 PROX1 (Q92786)  
215 were included because they could have potential RNA-binding ability (**Fig. 4D**)<sup>37</sup>. As for fragment  
216 2, we found two canonical RBPs: E3 ubiquitin-protein ligase TRIM32 (Q13049) and E3 ubiquitin-  
217 protein ligase TRIM21 (P19474), which are listed as negative regulators of viral release from host  
218 cell, negative regulators of viral transcription and positive regulators of viral entry into host cells.  
219 Finally, for fragment 29, 10 of the 11 viral proteins found are members of the *Gag polyprotein*  
220 *family*, that perform different tasks during HIV assembly, budding, maturation. More than a simple  
221 scaffold protein forming the viral core, Gag proteins are recognized as elements able to select viral  
222 and host proteins as they traffic to the cell membrane (**Supp. Table 1**)<sup>38</sup>.

223  
224 Analysis of functional annotations carried out with *GeneMania*<sup>39</sup> reveals that proteins interacting  
225 with the 5' of SARS-CoV-2 RNA are associated with regulatory pathways involving NOTCH2,  
226 MYC and MAX that have been previously connected to viral infection processes (**Fig. 4B**)<sup>40,41</sup>.  
227 Interestingly, some of the proteins, including DDX1, ZNF175 and CCNT1 for fragment 1 and  
228 TRIM32 for fragment 2, are reported to be necessary for HIV functions and replication inside the  
229 cell. The roles of these proteins in the replication of a retrovirus such as HIV are expected to be  
230 different from those associated with SARS-CoV-2, yet it has been reported that SARS-CoV-2  
231 represses host gene expression through a number of unknown mechanisms, which could also  
232 involve sequestration of transcriptional elements such as Cyclin-T1 CCNT1<sup>42</sup>. DDX1 is required  
233 for HIV-1 Rev function as well as for HIV-1 and coronavirus IBV replication and it binds to the  
234 RRE sequence of HIV-1 RNAs<sup>43,44</sup>. ZNF175 is relatively uncharacterized reported to interfere with  
235 HIV-1 replication by suppressing Tat-induced viral LTR promoter activity<sup>45</sup>. Finally, CCNT1 is  
236 7SK snRNA binding and regulates transactivation domain of the viral nuclear transcriptional  
237 activator, Tat<sup>46,47</sup>. In addition, TRIM32 (fragment 2) is a well-defined Tat binding protein and,



A. Vandelli *et al.* Structure and interactions of SARS-CoV-2

238 more specifically, it binds to the activation domain of HIV-1 Tat and can also interact with the HIV-  
239 2 and EIAV Tat proteins *in vivo* <sup>48</sup>.

240

241 **Analysis of interactions with SARS-CoV-2 Open Reading Frames identifies additional**  
242 **interactions involved in HIV infection**

243

244 Recently, Gordon *et al.* reported a list of human proteins binding to Open Reading Frames (ORFs)  
245 translated from SARS-CoV-2 <sup>49</sup>. Identified through affinity purification followed by mass  
246 spectrometry quantification, 332 proteins from HEK-293T cells interact with viral ORF peptides.  
247 By selecting 274 proteins binding at the 5' with Z score  $\geq 1.5$  (**Supp. Table 1**), of which 140 are  
248 exclusively interacting with fragment 1 (**Fig. 4B**), we found that 8 are also reported in the list by  
249 Gordon *et al.* <sup>49</sup>, which indicates significant enrichment (representation factor of 2.5; p-value of  
250 0.02; hypergeometric test with human proteome in background). The fact that our list of protein-  
251 RNA binding partners contains elements identified also in the protein-protein network analysis is  
252 not surprising, as ribonucleoprotein complexes evolve together <sup>13</sup> and their components sustain each  
253 other activities through different types of interactions <sup>15</sup>.

254

255 We note that out of 332 interactions, 60 are RBPs (as reported in Uniprot <sup>36</sup>), which represents a  
256 considerable fraction (20%), considering that there are around 1500 RBPs in the human proteome  
257 (6%) and fully justified by the fact that they involve association with viral RNAs. Comparing the  
258 RBPs present in Gordon *et al.* <sup>49</sup> and those present in our list (79 as reported in Uniprot), we found  
259 an overlap of 6 proteins (representation factor = 26.5; p-value  $< 10^{-8}$ ; hypergeometric test),  
260 including: Janus kinase and microtubule-interacting protein 1 JAKMIP1 (Q96N16), A-kinase  
261 anchor protein 8 AKAP8 (O43823) and A-kinase anchor protein 8-like AKAP8L (Q9ULX6),  
262 which in case of HIV-1 infection is involved as a DEAD/H-box RNA helicase binding <sup>50</sup>, signal  
263 recognition particle subunit SRP72 (O76094), binding to the 7S RNA in presence of SRP68, La-  
264 related protein 7, LARP7 (Q4G0J3) and La-related protein 4B LARP4B (Q92615), which are part  
265 of a system for transcriptional regulation acting by means of the 7SK RNP system <sup>51</sup> (**Fig. 4E**;  
266 **Supp. Table 2**). We speculate that sequestration of elements binding to the 7S RNA is part of a  
267 viral program aiming to host genes <sup>42</sup>.

268

269 Moreover, by analysing the RNA interaction potential of all the 332 proteins by Gordon *et al.* <sup>49</sup>,  
270 *catRAPID* identified 38 putative binders at the 5' (Z score  $\geq 1.5$ ; 27 occurring exclusively in the 5'  
271 and not in other regions of the RNA) <sup>16</sup>, including Serine/threonine-protein kinase TBK1



A. Vandelli *et al.* Structure and interactions of SARS-CoV-2

272 (Q9UHD2), among which 10 RBPs (as reported in Uniprot) such as: Splicing elements U3 small  
273 nucleolar ribonucleoprotein protein MPP10 (O00566) and Pre-mRNA-splicing factor SLU7  
274 (O95391), snRNA methylphosphate capping enzyme MEPCE involved in negative regulation of  
275 transcription by RNA polymerase II 7SK (Q7L2J0)<sup>52</sup>, Nucleolar protein 10 NOL10 (Q9BSC4) and  
276 protein kinase A Radixin RDX (P35241; in addition to those mentioned above; **Supp. Table 2**).

277

278 **HIV-related RBPs are significantly enriched in the 5' interactions**

279

280 In the list of 274 proteins predicted to bind at the 5' (fragment 1) with Z score  $\geq 1.5$ , we found 10  
281 hits reported to be involved in HIV (**Supp. Table 3**), which is a highly significant enrichment (p-  
282 value=0.0004; Fisher's exact test), considering that the total number of HIV-related proteins is 35 in  
283 the whole *catRAPID* library (3340 elements). The complete list of proteins includes ATP-  
284 dependent RNA helicase DDX1 (Q92499 also involved in Coronavirus replication<sup>43,44</sup>), ATP-  
285 dependent RNA helicase DDX3X (O00571 also involved in Dengue and Zika Viruses), Tyrosine-  
286 protein kinase HCK (P08631, nucleotide binding), Arf-GAP domain and FG repeat-containing  
287 protein 1 (P52594), Double-stranded RNA-specific editase 1 ADARB1 (P78563), Insulin-like  
288 growth factor 2 mRNA-binding protein 1 IGF2BP1 (Q9NZI8), A-kinase anchor protein 8-like  
289 AKAP8L (Q9ULX6; its partner AKAP8 is also found in Gordon *et al.*<sup>49</sup>) Cyclin-T1 CCNT1  
290 (O60563; DNA-binding) and Forkhead box protein K2 FOXX2 (Q01167; DNA-binding; **Supp.**  
291 **Table 3**).

292

293

294 Smaller enrichments were found for proteins related to Hepatitis B virus (HBV; p-value=0.01; 3  
295 hits out of 7 in the whole *catRAPID* library; Fisher's exact test), Nuclear receptor subfamily 5  
296 group A member 2 NR5A2 (DNA-binding; O00482), Interferon-induced, double-stranded RNA-  
297 activated protein kinase EIF2AK2 (P19525), and SRSF protein kinase 1 SRPK1 (Q96SB4) as well  
298 as Influenza (p-value=0.03; 2 hits out of 4; Fisher's exact test), Synaptic functional regulator FMR1  
299 (Q06787) and RNA polymerase-associated protein RTF1 homologue (Q92541; **Supp. Table 3**). By  
300 contrast, no significant enrichments were found for other viruses such as for instance Ebola.

301

302 Interestingly, specific drugs are reported in ChEMBL<sup>53</sup> for HIV-related proteins ATP-dependent  
303 RNA helicase DDX1 (ChEMBL2011807), ATP-dependent RNA helicase DDX3X  
304 (ChEMBL2011808), Cyclin-T1 CCNT1 (ChEMBL2348842), and Tyrosine-protein kinase HCK  
305 (ChEMBL2408778)<sup>53</sup>, as well as HVB-related proteins Nuclear receptor subfamily 5 group A  
306 member 2 NR5A2 (ChEMBL3544), Interferon-induced, double-stranded RNA-activated protein

A. Vandelli *et al.* Structure and interactions of SARS-CoV-2

307 kinase EIF2AK2 (ChEMBL5785) and SRSF protein kinase 1 SRPK1 (ChEMBL4375), which  
308 could be a starting point for further investigations.

309

310 **CONCLUSIONS**

311

312 Our study is motivated by the need to identify molecular mechanisms involved in Covid-19  
313 spreading. Using advanced computational approaches, we investigated the structural content of  
314 SARS-CoV-2 RNA and predicted human proteins that bind it.

315

316 We employed *CROSS*<sup>12,54</sup> to compare the structural properties of 2800 coronaviruses and identified  
317 elements conserved in SARS-CoV-2 strains. The regions containing the highest amount of structure  
318 are the 5' as well as glycoproteins spike S and membrane M.

319

320 We found that the spike S protein domain encompassing amino acids 330-500 is highly conserved  
321 across SARS-CoV-2 strains. This result suggests that spike S must have evolved to specifically  
322 interact with its host partner ACE2<sup>27</sup> and mutations increasing the binding affinity are highly  
323 infrequent. As the nucleic acids encoding for this region are enriched in double-stranded content,  
324 we speculate that the structure might attract host regulatory elements, which further constrains its  
325 variability. The fact that the ACE2 receptor binding site is conserved among the SARS-CoV-2  
326 strains suggests that a specific drug can be designed to prevent host interaction and thus infection,  
327 which could work for a large number of coronaviruses.

328

329 By contrast, the highly variable region at amino acids 243-302 in spike S protein corresponds to the  
330 binding site of sialic acids in MERS-CoV (see manuscript by E. Milanetti *et al.* "In-Silico evidence  
331 for two receptors based strategy of SARS-CoV-2")<sup>7,9,31</sup> and could play a role in infection<sup>30</sup>. The  
332 fact that the binding region changes in the different strains might indicate a variety of binding  
333 affinities for sialic acids, which could provide clues on the specific responses in the human  
334 population. Interestingly, the sialic acid binding site is absent in SARS-CoV but present in MERS-  
335 CoV, which indicates that it must have evolved recently.

336

337 Both our sequence and structural analyses of spike S protein indicate that human engineering of  
338 SARS-CoV-2 is highly unlikely.

339

A. Vandelli *et al.* Structure and interactions of SARS-CoV-2

340 Using *catRAPID*<sup>16,17</sup> we computed >100000 protein interactions with SARS-CoV-2 and found that  
341 the highly structured region at the 5' has the largest number of protein partners including ATP-  
342 dependent RNA helicase DDX1, which has been previously reported to be essential for HIV-1 and  
343 coronavirus IBV replication<sup>43,44</sup>, double-stranded RNA-specific editase 1 ADARB1, which  
344 catalyses the hydrolytic deamination of adenosine to inosine and might take part in the chemical  
345 modification of SARS-CoV-2 RNA<sup>42</sup>. Other relevant interactions are XRCC5 and XRCC6  
346 members of the HDP-RNP complex interacting with ATP-dependent RNA helicase DHX9<sup>55</sup> and  
347 2-5A-dependent ribonuclease RNASEL that has antiviral effects through a combination of cleavage  
348 of single-stranded viral RNAs, inhibition of protein synthesis, induction of apoptosis, and induction  
349 of antiviral genes<sup>56</sup>.

350

351 A significant overlap exists with the list of protein interactions reported by Gordon *et al.*<sup>49</sup>, and  
352 among the candidate partners we identified AKAP8L, involved as a DEAD/H-box RNA helicase  
353 binding in HIV infection<sup>50</sup>. In general, proteins involved in the replication of retroviruses such as  
354 HIV are expected to play a different role in mechanisms related to SARS-CoV-2 that uses its own  
355 RNA-dependent RNA polymerase, yet it must be considered that SARS-CoV-2 represses host gene  
356 expression through a number of unknown mechanisms, which could imply sequestration of  
357 transcriptional components, such as specific polymerase II genes and splicing factors<sup>42</sup>. Thus, the  
358 link to HIV and other viruses such as HBV and Influenza could be key to identify targets for the  
359 repurposing of drugs for treatment of SARS-CoV-2 infection<sup>53</sup>.

360

361 In conclusion, we hope that our analysis would be useful to the scientific community to identify  
362 virus-host interactions and block SARS-CoV-2 spreading.

363

364 **Acknowledgements**

365

366 The authors would like to thank Jakob Rupert, Dr. Mattia Miotto, Dr Lorenzo Di Rienzo, Dr.  
367 Alexandros Armaos, Dr. Alessandro Dasti, Dr. Elias Bechara, Dr. Claudia Giambartolomei and Dr.  
368 Elsa Zacco for discussions.

369

370 The research leading to these results has been supported by European Research Council  
371 (RIBOMYLOME\_309545 to GGT, ASTRA\_855923 to GGT), Spanish Ministry of Economy and  
372 Competitiveness BFU2017-86970-P, the H2020 projects INFORE\_825080 and IASIS\_727658, as  
373 well as the collaboration with Peter St. George-Hyslop financed by the Wellcome Trust.

374

375 **Contributions.** GGT and RDP conceived the study. AV carried out *cat*RAPID analysis of protein  
376 interactions, RDP calculated *CROSS* structures of coronaviruses, GGT, MM and EM performed and  
377 analysed sequence alignments. AV, RDP and GGT wrote the paper.

378

379 **MATERIALS AND METHODS**

380

381 *Structure prediction*

382

383 We predicted the secondary structure of transcripts using *CROSS* (Computational Recognition of  
384 Secondary Structure<sup>12,54</sup>. *CROSS* was developed to perform high-throughput RNA profiling. The  
385 algorithm predicts the structural profile (single- and double-stranded state) at single-nucleotide  
386 resolution using sequence information only and without sequence length restrictions (scores > 0  
387 indicate double stranded regions). We used the *Vienna* method<sup>25</sup> to further investigate the RNA  
388 secondary structure of minima and maxima identified with *CROSS*<sup>12</sup>.

389

390 *Structural conservation*

391

392 We used *CROSSalign*<sup>12,54</sup> an algorithm based on Dynamic Time Warping (DTW), to check and  
393 evaluate the structural conservation between different viral genomes<sup>12</sup>. *CROSSalign* was  
394 previously employed to study the structural conservation of ~5000 HIV genomes. SARS-CoV-2  
395 fragments (1000 nt, not overlapping) were searched inside other complete genomes using the OBE  
396 (open begin and end) module, in order to search a small profile inside a larger one. The lower the  
397 structural distance, the higher the structural similarities (with a minimum of 0 for almost identical  
398 secondary structure profiles). The significance is assessed as in the original publication<sup>12</sup>.

399

400 *Sequence collection*

401

402 The FASTA sequences of the complete genomes of SARS-CoV-2 were downloaded from Virus  
403 Pathogen Resource (VIPR; [www.viprbrc.org](http://www.viprbrc.org)), for a total of 62 strains. Regarding the overall  
404 coronaviruses, the sequences were downloaded from NCBI selecting only complete genomes, for a  
405 total of 2862 genomes. The reference Wuhan sequence with available annotation  
406 (EPI\_ISL\_402119) was downloaded from Global Initiative on Sharing All Influenza Data. (GISAID  
407 <https://www.gisaid.org/>).

408

409

410

411

412

A. Vandelli et al. *Structure and interactions of SARS-CoV-2*

413 ***Protein-RNA interaction prediction***

414

415 Interactions between each fragment of target sequence and the human proteome were predicted  
416 using *catRAPID omics*<sup>16,17</sup>, an algorithm that estimates the binding propensity of protein-RNA  
417 pairs by combining secondary structure, hydrogen bonding and van der Waals contributions. As  
418 reported in a recent analysis of about half a million of experimentally validated interactions<sup>31</sup>, the  
419 algorithm is able to separate interacting vs non-interacting pairs with an area under the ROC curve  
420 of 0.78.

421 The complete list of interactions between the 30 fragments and the human proteome is available at  
422 [http://crg-webservice.s3.amazonaws.com/submissions/2020-](http://crg-webservice.s3.amazonaws.com/submissions/2020-03/252523/output/index.html?unlock=f6ca306af0)  
423 [03/252523/output/index.html?unlock=f6ca306af0](http://crg-webservice.s3.amazonaws.com/submissions/2020-03/252523/output/index.html?unlock=f6ca306af0). The output then is filtered according to the Z-  
424 score column, which is the interaction propensity normalised by the mean and standard deviation  
425 calculated over the reference RBP set ([http://s.tartagliolab.com/static\\_files/shared/faqs.html#4](http://s.tartagliolab.com/static_files/shared/faqs.html#4)). We  
426 used three different thresholds in ascending order of stringency: Z greater or equal than 1.50, 1.75  
427 and 2 respectively and for each threshold we then selected the proteins that were unique for each  
428 fragment for each threshold.

429

430

431 ***GO terms analysis***

432

433 *cleverGO*<sup>35</sup>, an algorithm for the analysis of Gene Ontology annotations, was used to determine  
434 which fragments present enrichment in GO terms related to viral processes. Analysis of functional  
435 annotations was performed in parallel with *GeneMania*<sup>39</sup>.

436

437

438 ***RNA and protein alignments***

439

440 We used *Clustal W*<sup>26</sup> for 62 SARS-CoV-2 strains alignments and *Tcoffee*<sup>29</sup> for spike S proteins  
441 alignments. The variability in the spike S region was measured by computing Shannon entropy on  
442 translated RNA sequences. The Shannon entropy is computed as follows:

443

444  $S(a) = - \sum_i P(a,i) \log P(a,i)$

445



*A. Vandelli et al. Structure and interactions of SARS-CoV-2*

446 Where  $a$  correspond to the amino acid at the position  $i$  and  $P(a,i)$  is the frequency of a certain  
447 amino-acid  $a$  at position  $i$  of the sequence. Low entropy indicates poorly variability: if  $P(a,x) = 1$  for  
448 one  $a$  and 0 for the rest, then  $S(x) = 0$ . By contrast, if the frequencies of all amino acids are equally  
449 distributed, the entropy reaches its maximum possible value.

450

A. Vandelli *et al.* Structure and interactions of SARS-CoV-2

- 451 1. Zhu, N. *et al.* A Novel Coronavirus from Patients with Pneumonia in China, 2019. *N. Engl. J.*  
452 *Med.* **382**, 727–733 (2020).
- 453 2. D'Antiga, L. Coronaviruses and immunosuppressed patients. The facts during the third  
454 epidemic. *Liver Transplant. Off. Publ. Am. Assoc. Study Liver Dis. Int. Liver Transplant. Soc.*  
455 (2020) doi:10.1002/lt.25756.
- 456 3. Cascella, M., Rajnik, M., Cuomo, A., Dulebohn, S. C. & Di Napoli, R. Features, Evaluation and  
457 Treatment Coronavirus (COVID-19). in *StatPearls* (StatPearls Publishing, 2020).
- 458 4. Ge, X.-Y. *et al.* Isolation and characterization of a bat SARS-like coronavirus that uses the  
459 ACE2 receptor. *Nature* **503**, 535–538 (2013).
- 460 5. Follis, K. E., York, J. & Nunberg, J. H. Furin cleavage of the SARS coronavirus spike  
461 glycoprotein enhances cell-cell fusion but does not affect virion entry. *Virology* **350**, 358–369  
462 (2006).
- 463 6. Xiao, K. *et al.* Isolation and Characterization of 2019-nCoV-like Coronavirus from Malayan  
464 Pangolins. *bioRxiv* 2020.02.17.951335 (2020) doi:10.1101/2020.02.17.951335.
- 465 7. Park, Y.-J. *et al.* Structures of MERS-CoV spike glycoprotein in complex with sialoside  
466 attachment receptors. *Nat. Struct. Mol. Biol.* **26**, 1151–1157 (2019).
- 467 8. Walls, A. C. *et al.* Cryo-electron microscopy structure of a coronavirus spike glycoprotein  
468 trimer. *Nature* **531**, 114–117 (2016).
- 469 9. Li, W. *et al.* Identification of sialic acid-binding function for the Middle East respiratory  
470 syndrome coronavirus spike glycoprotein. *Proc. Natl. Acad. Sci. U. S. A.* **114**, E8508–E8517  
471 (2017).
- 472 10. Yang, D. & Leibowitz, J. L. The Structure and Functions of Coronavirus Genomic 3' and 5'  
473 Ends. *Virus Res.* **206**, 120–133 (2015).
- 474 11. Delli Ponti, R., Marti, S., Armaos, A. & Tartaglia, G. G. A high-throughput approach to profile  
475 RNA structure. *Nucleic Acids Res.* **45**, e35–e35 (2017).

A. Vandelli *et al.* Structure and interactions of SARS-CoV-2

- 476 12. Delli Ponti, R., Armaos, A., Marti, S. & Gian Gaetano Tartaglia. A Method for RNA Structure  
477 Prediction Shows Evidence for Structure in lncRNAs. *Front. Mol. Biosci.* **5**, 111 (2018).
- 478 13. Sanchez de Groot, N. *et al.* RNA structure drives interaction with proteins. *Nat. Commun.* **10**,  
479 3246 (2019).
- 480 14. Cid-Samper, F. *et al.* An Integrative Study of Protein-RNA Condensates Identifies Scaffolding  
481 RNAs and Reveals Players in Fragile X-Associated Tremor/Ataxia Syndrome. *Cell Rep.* **25**,  
482 3422-3434.e7 (2018).
- 483 15. Cerase, A. *et al.* Phase separation drives X-chromosome inactivation: a hypothesis. *Nat. Struct.*  
484 *Mol. Biol.* **26**, 331 (2019).
- 485 16. Agostini, F. *et al.* catRAPID omics: a web server for large-scale prediction of protein-RNA  
486 interactions. *Bioinforma. Oxf. Engl.* **29**, 2928–2930 (2013).
- 487 17. Cirillo, D. *et al.* Quantitative predictions of protein interactions with long noncoding RNAs.  
488 *Nat. Methods* **14**, 5–6 (2017).
- 489 18. Bellucci, M., Agostini, F., Masin, M. & Tartaglia, G. G. Predicting protein associations with  
490 long noncoding RNAs. *Nat. Methods* **8**, 444–445 (2011).
- 491 19. Lang, B., Armaos, A. & Tartaglia, G. G. RNAct: Protein–RNA interaction predictions for  
492 model organisms with supporting experimental data. *Nucleic Acids Res.*  
493 doi:10.1093/nar/gky967.
- 494 20. Kliger, Y. & Levanon, E. Y. Cloaked similarity between HIV-1 and SARS-CoV suggests an  
495 anti-SARS strategy. *BMC Microbiol.* **3**, 20 (2003).
- 496 21. Hallenberger, S. *et al.* Inhibition of furin-mediated cleavage activation of HIV-1 glycoprotein  
497 gp160. *Nature* **360**, 358–361 (1992).
- 498 22. Glowacka, I. *et al.* Differential downregulation of ACE2 by the spike proteins of severe acute  
499 respiratory syndrome coronavirus and human coronavirus NL63. *J. Virol.* **84**, 1198–1205  
500 (2010).

A. Vandelli et al. Structure and interactions of SARS-CoV-2

- 501 23. Gultyaev, A. P., Richard, M., Spronken, M. I., Olsthoorn, R. C. L. & Fouchier, R. A. M.  
502 Conserved structural RNA domains in regions coding for cleavage site motifs in hemagglutinin  
503 genes of influenza viruses. *Virus Evol.* **5**, (2019).
- 504 24. Wu, A. et al. Genome Composition and Divergence of the Novel Coronavirus (2019-nCoV)  
505 Originating in China. *Cell Host Microbe* **27**, 325–328 (2020).
- 506 25. Lorenz, R. et al. ViennaRNA Package 2.0. *Algorithms Mol. Biol.* **6**, 26 (2011).
- 507 26. Madeira, F. et al. The EMBL-EBI search and sequence analysis tools APIs in 2019. *Nucleic*  
508 *Acids Res.* **47**, W636–W641 (2019).
- 509 27. Andersen, K. G., Rambaut, A., Lipkin, W. I., Holmes, E. C. & Garry, R. F. The proximal origin  
510 of SARS-CoV-2. *Nat. Med.* 1–3 (2020) doi:10.1038/s41591-020-0820-9.
- 511 28. Zhou, P. et al. A pneumonia outbreak associated with a new coronavirus of probable bat origin.  
512 *Nature* **579**, 270–273 (2020).
- 513 29. Di Tommaso, P. et al. T-Coffee: a web server for the multiple sequence alignment of protein  
514 and RNA sequences using structural information and homology extension. *Nucleic Acids Res.*  
515 **39**, W13–W17 (2011).
- 516 30. Qing, E., Hantak, M., Perlman, S. & Gallagher, T. Distinct Roles for Sialoside and Protein  
517 Receptors in Coronavirus Infection. *mBio* **11**, (2020).
- 518 31. Milanetti, E. et al. In-Silico evidence for two receptors based strategy of SARS-CoV-2.  
519 *ArXiv200311107 Phys. Q-Bio* (2020).
- 520 32. Galán, C. et al. Host cell proteins interacting with the 3' end of TGEV coronavirus genome  
521 influence virus replication. *Virology* **391**, 304–314 (2009).
- 522 33. Lu, K., Heng, X. & Summers, M. F. Structural determinants and mechanism of HIV-1 genome  
523 packaging. *J. Mol. Biol.* **410**, 609–633 (2011).
- 524 34. Fehr, A. R. & Perlman, S. Coronaviruses: An Overview of Their Replication and Pathogenesis.  
525 *Methods Mol. Biol. Clifton NJ* **1282**, 1–23 (2015).

A. Vandelli *et al.* Structure and interactions of SARS-CoV-2

- 526 35. Klus, P., Ponti, R. D., Livi, C. M. & Tartaglia, G. G. Protein aggregation, structural disorder  
527 and RNA-binding ability: a new approach for physico-chemical and gene ontology  
528 classification of multiple datasets. *BMC Genomics* **16**, 1071 (2015).
- 529 36. UniProt: a worldwide hub of protein knowledge. *Nucleic Acids Res.* **47**, D506–D515 (2019).
- 530 37. Castello, A. *et al.* Insights into RNA biology from an atlas of mammalian mRNA-binding  
531 proteins. *Cell* **149**, 1393–1406 (2012).
- 532 38. Bell, N. M. & Lever, A. M. L. HIV Gag polyprotein: processing and early viral particle  
533 assembly. *Trends Microbiol.* **21**, 136–144 (2013).
- 534 39. Warde-Farley, D. *et al.* The GeneMANIA prediction server: biological network integration for  
535 gene prioritization and predicting gene function. *Nucleic Acids Res.* **38**, W214–W220 (2010).
- 536 40. Hayward, S. D. Viral interactions with the Notch pathway. *Semin. Cancer Biol.* **14**, 387–396  
537 (2004).
- 538 41. Dudley, J. P., Mertz, J. A., Rajan, L., Lozano, M. & Broussard, D. R. What retroviruses teach  
539 us about the involvement of c- Myc in leukemias and lymphomas. *Leukemia* **16**, 1086–1098  
540 (2002).
- 541 42. Kim, D. *et al.* The architecture of SARS-CoV-2 transcriptome. *bioRxiv* 2020.03.12.988865  
542 (2020) doi:10.1101/2020.03.12.988865.
- 543 43. Fang, J. *et al.* A DEAD box protein facilitates HIV-1 replication as a cellular co-factor of Rev.  
544 *Virology* **330**, 471–480 (2004).
- 545 44. Xu, L. *et al.* The cellular RNA helicase DDX1 interacts with coronavirus nonstructural protein  
546 14 and enhances viral replication. *J. Virol.* **84**, 8571–8583 (2010).
- 547 45. Carlson, K. A. *et al.* Molecular characterization of a putative antiretroviral transcriptional  
548 factor, OTK18. *J. Immunol. Baltim. Md 1950* **172**, 381–391 (2004).
- 549 46. Ivanov, D. *et al.* Cyclin T1 domains involved in complex formation with Tat and TAR RNA are  
550 critical for tat-activation. *J. Mol. Biol.* **288**, 41–56 (1999).

A. Vandelli et al. Structure and interactions of SARS-CoV-2

- 551 47. Kwak, Y. T., Ivanov, D., Guo, J., Nee, E. & Gaynor, R. B. Role of the human and murine cyclin  
552 T proteins in regulating HIV-1 tat-activation. *J. Mol. Biol.* **288**, 57–69 (1999).
- 553 48. Locke, M., Tinsley, C. L., Benson, M. A. & Blake, D. J. TRIM32 is an E3 ubiquitin ligase for  
554 dysbindin. *Hum. Mol. Genet.* **18**, 2344–2358 (2009).
- 555 49. Gordon, D. E. et al. A SARS-CoV-2-Human Protein-Protein Interaction Map Reveals Drug  
556 Targets and Potential Drug-Repurposing. *bioRxiv* 2020.03.22.002386 (2020)  
557 doi:10.1101/2020.03.22.002386.
- 558 50. Xing, L., Zhao, X., Guo, F. & Kleiman, L. The role of A-kinase anchoring protein 95-like  
559 protein in annealing of tRNA<sup>Lys3</sup> to HIV-1 RNA. *Retrovirology* **11**, 58 (2014).
- 560 51. Markert, A. et al. The La-related protein LARP7 is a component of the 7SK ribonucleoprotein  
561 and affects transcription of cellular and viral polymerase II genes. *EMBO Rep.* **9**, 569–575  
562 (2008).
- 563 52. C, J. et al. Systematic Analysis of the Protein Interaction Network for the Human Transcription  
564 Machinery Reveals the Identity of the 7SK Capping Enzyme. *Molecular cell* vol. 27  
565 <https://pubmed.ncbi.nlm.nih.gov/17643375/> (2007).
- 566 53. Mendez, D. et al. ChEMBL: towards direct deposition of bioassay data. *Nucleic Acids Res.* **47**,  
567 D930–D940 (2019).
- 568 54. Delli Ponti, R., Marti, S., Armaos, A. & Tartaglia, G. G. A high-throughput approach to profile  
569 RNA structure. *Nucleic Acids Res.* **45**, e35–e35 (2017).
- 570 55. Zhang, S., Schlott, B., Görlach, M. & Grosse, F. DNA-dependent protein kinase (DNA-PK)  
571 phosphorylates nuclear DNA helicase II/RNA helicase A and hnRNP proteins in an RNA-  
572 dependent manner. *Nucleic Acids Res.* **32**, 1–10 (2004).
- 573 56. Siddiqui, M. A., Mukherjee, S., Manivannan, P. & Malathi, K. RNase L Cleavage Products  
574 Promote Switch from Autophagy to Apoptosis by Caspase-Mediated Cleavage of Beclin-1. *Int.*  
575 *J. Mol. Sci.* **16**, 17611–17636 (2015).
- 576



*A. Vandelli et al. Structure and interactions of SARS-CoV-2*

577

578

579 **FIGURES LEGENDS**

580

581 **Fig. 1.** Using the CROSS approach<sup>12,54</sup>, we studied the structural content of SARS-CoV-2. We  
582 found the highest density of double-stranded regions in the 5' (nucleotides 1-253), membrane M  
583 protein (nucleotides 26523-27191), and the spike S protein (nucleotides 23000-24000). Strong  
584 match is observed between CROSS and Vienna analyses (centroid structures shown, indicating that  
585 regions with the highest structural content have the lowest free energies.

586

587 **Fig. 2.** We employed the CROSSalign approach<sup>12,54</sup> to compare the Wuhan strain MN908947 with  
588 other coronaviruses (1387 strains, including SARS-CoV and MERS-CoV) indicates that the most  
589 conserved region falls inside the spike S genomic locus. The inset shows thermodynamic structural  
590 variability (positional entropy) within regions encompassing nucleotides 23000-24000 along with  
591 the centroid structure and free energy.

592

593 **Fig. 3.** Sequence and structural comparison of human SARS-CoV-2 strains. (A) Strong sequence  
594 conservation (Clustal W multiple sequence alignments<sup>35</sup>) is observed in coding regions, including  
595 the region between nucleotides 23000 and 24000 of spike S protein. High structural variability (red  
596 bars on top) is observed for both the UTRs and for nucleotides between 21000 and 22000 as well as  
597 24000 and 25000, associated with the S region. The rest of the regions are significantly conserved  
598 at a structural level. (B) The sequence variability (Shannon entropy computed on Tcoffee multiple  
599 sequence alignments<sup>29</sup>) in the spike S protein indicate conservation between amino-acids 460 and  
600 520 (blue box) binding to the host receptor angiotensin-converting enzyme 2 ACE2. The region  
601 encompassing amino-acids 243 and 302 is highly variable and is implicated in sialic acids in  
602 MERS-CoV (red box). The S1 and S2 domains of Spike S protein are displayed.

603

604 **Fig. 4.** Characterization of protein interactions with SARS-CoV-2 RNA, (A) Number of RBP  
605 interactions for different SARS-CoV-2 regions (colours indicate different catRAPID<sup>16,17</sup> confidence  
606 levels: Z=1.5 or low Z=1.75 or medium and Z=2.0 or high; regions with scores lower than Z=1.5  
607 are omitted); (B) Enrichment of viral processes in the 5' of SARS-CoV-2 (precision = term  
608 precision calculated from the GO graph structure lvl = depth of the term; go\_term = GO term  
609 identifier, with link to term description at AmiGO website ; description = Textual label for the term;  
610 e/d = e signifies enrichment of the term, d signifies depletion compared to the population; %\_set =  
611 coverage on the provided set - how much of the set is annotated with the GO?; %\_pop = coverage  
612 of the same term on the population; p\_bonf = p-value of the enrichment. To correct for multiple

*A. Vandelli et al. Structure and interactions of SARS-CoV-2*

613 *testing bias, we are applying Bonferroni correction)<sup>35</sup>; **(C)** *Viral processes are the third largest*  
614 *cluster identified in our analysis; (D) Protein interactions with the 5' of SARS-CoV-2 RNA (inner*  
615 *circle) and associations with other human genes retrieved from literature (green: genetic*  
616 *associations; pink: physical associations); (E) Number of RBP interactions identified by Gordon et*  
617 *al.*<sup>49</sup> *for different SARS-CoV-2 regions (see panel A for reference).**

A. Vandelli et al. Structure and interactions of SARS-CoV-2

618 **SUPPLEMENTARY MATERIAL**

619

620

621 **Supp. Figure 1.** We employed CROSSalign<sup>12,54</sup> was to compare the Wuhan strain MN908947  
622 with other coronaviruses (2800 strains, including SARS-CoV, MERS-CoV and coronaviruses  
623 having as host other species, such as bats). The result highlights that the most conserved region  
624 falls inside the spike S genomic locus.

625

626 **Supp. Table 1.** 1) catRAPID<sup>16,17</sup> score for interactions with fragment 1; 2) GO<sup>35</sup> and Uniprot  
627 annotations of viral proteins interacting with fragment 1 and ; 3) catRAPID score for interactions  
628 with fragment 2; 4) GO annotations of viral proteins interacting with fragment 2; 5) catRAPID  
629 score for interactions with fragment 29; 6) GO annotations of viral proteins interacting with  
630 fragment 29;

631

632 **Supp. Table 2.** RBP interactions from Gordon et al.<sup>49</sup> classified according to catRAPID scores.  
633 GO<sup>35</sup> and Uniprot<sup>36</sup> annotations are reported.

634

635 **Supp. Table 3.** RBPs significantly enriched in the 5' interactions and HIV, HBV and Influenza

636

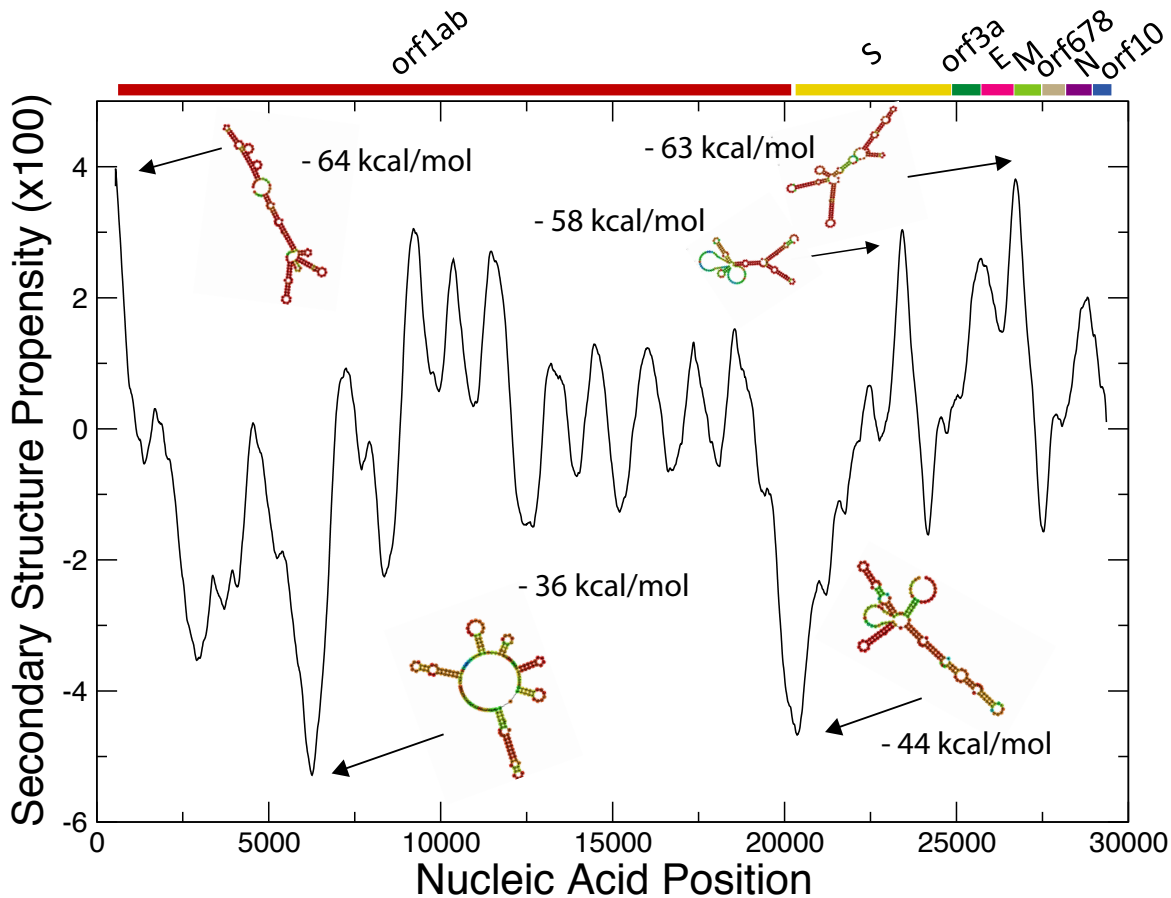

orf1ab

S

orf3a

E

M

orf678

N

orf10

Structural Variability

0.110  
0.105  
0.100  
0.950  
0.900

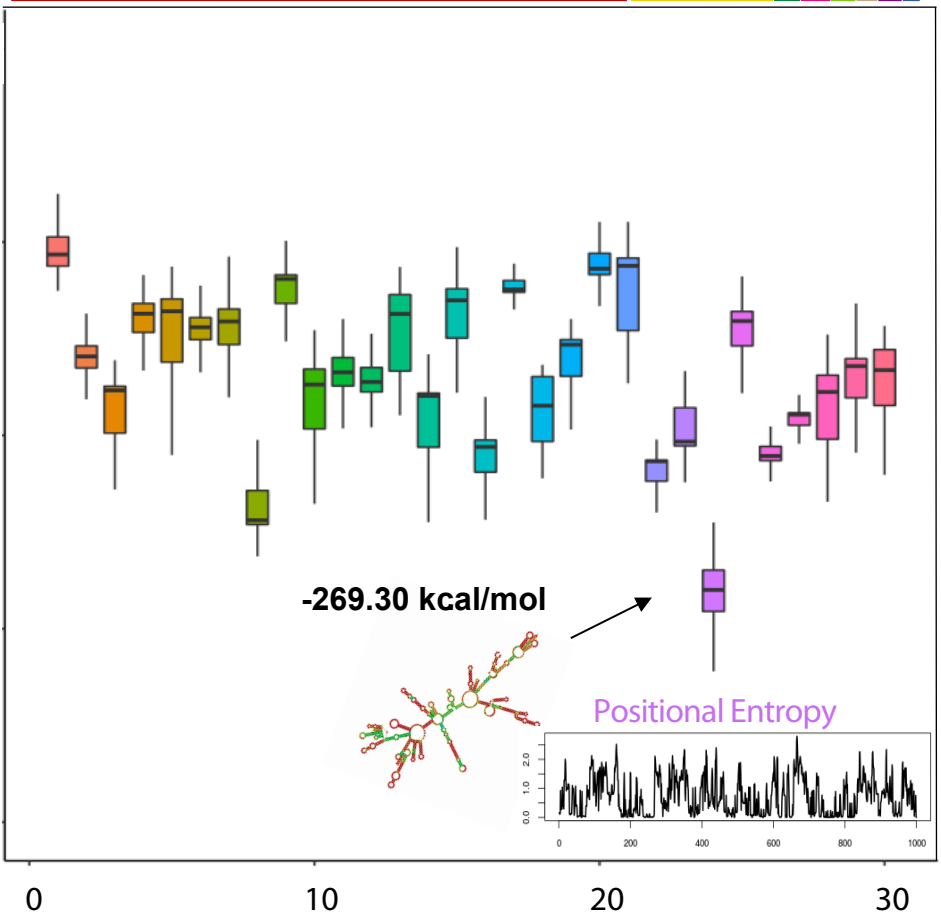

-269.30 kcal/mol

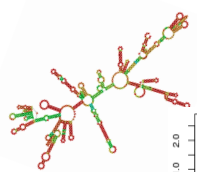

Positional Entropy

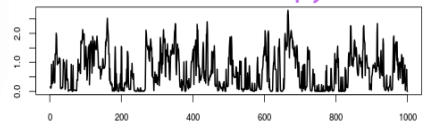

0 10 20 30

Genomic Region (Kb)



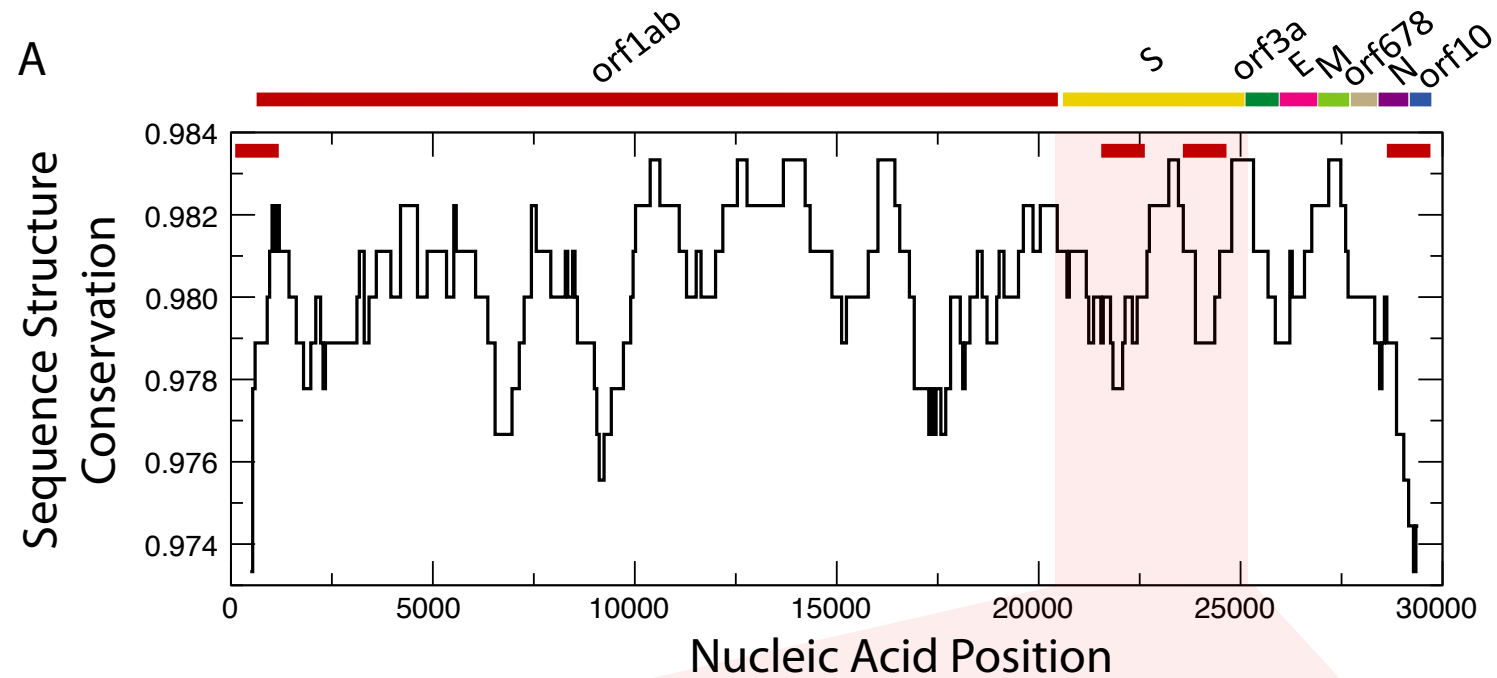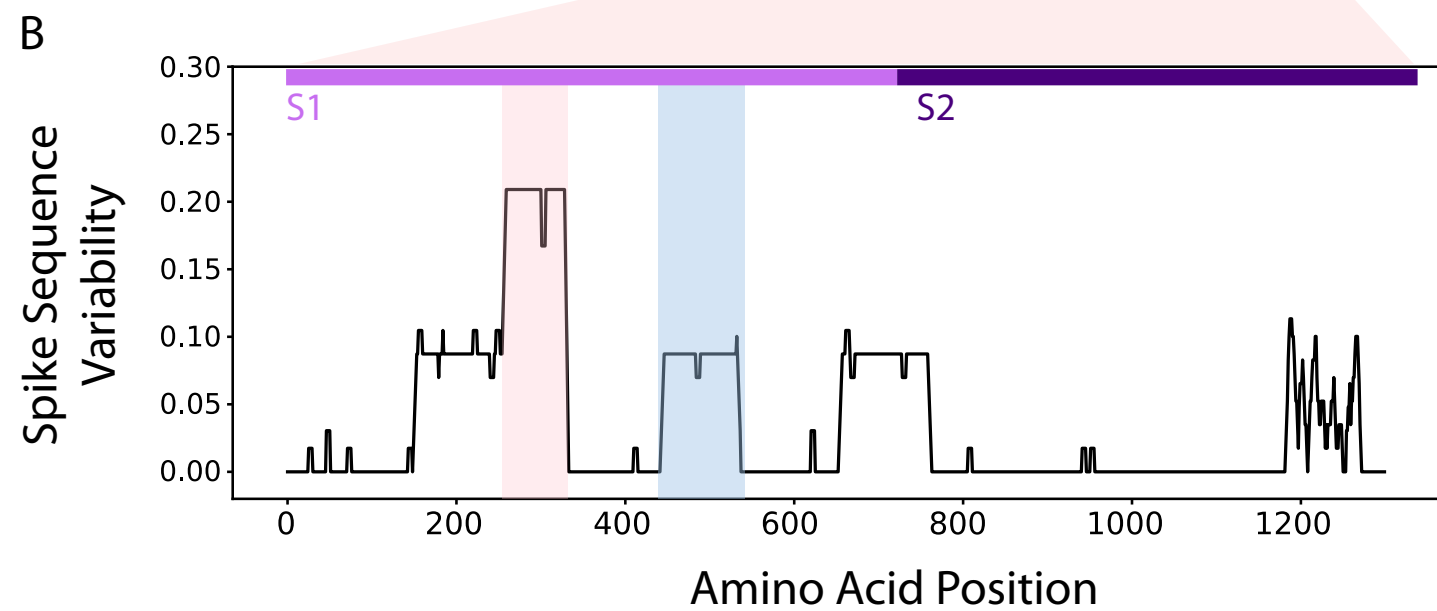

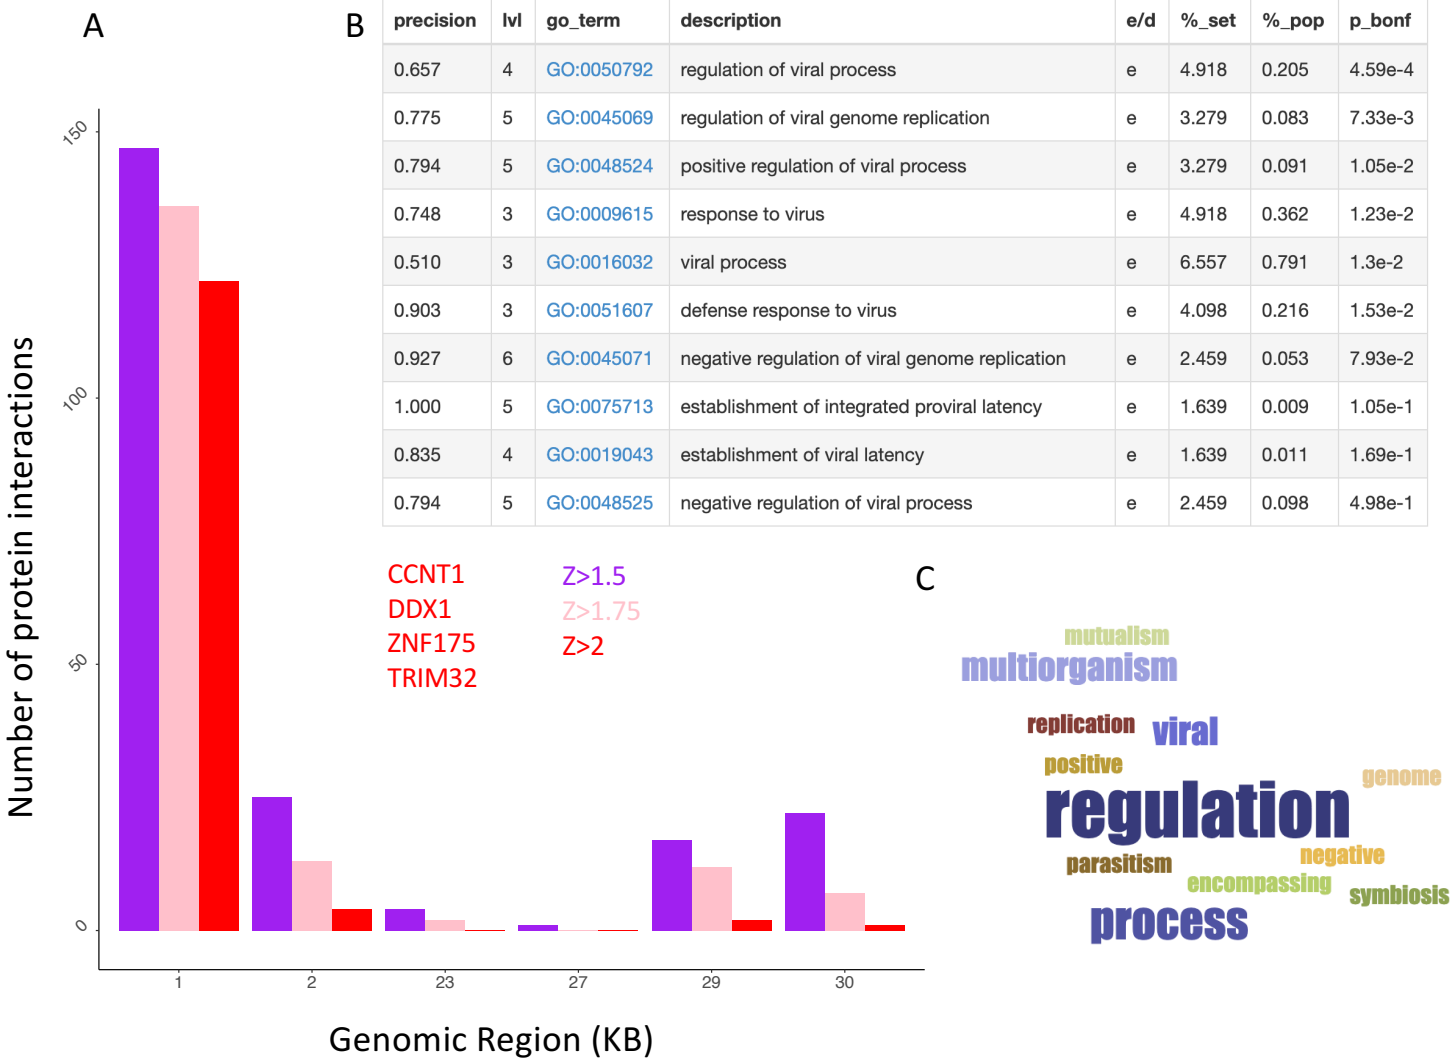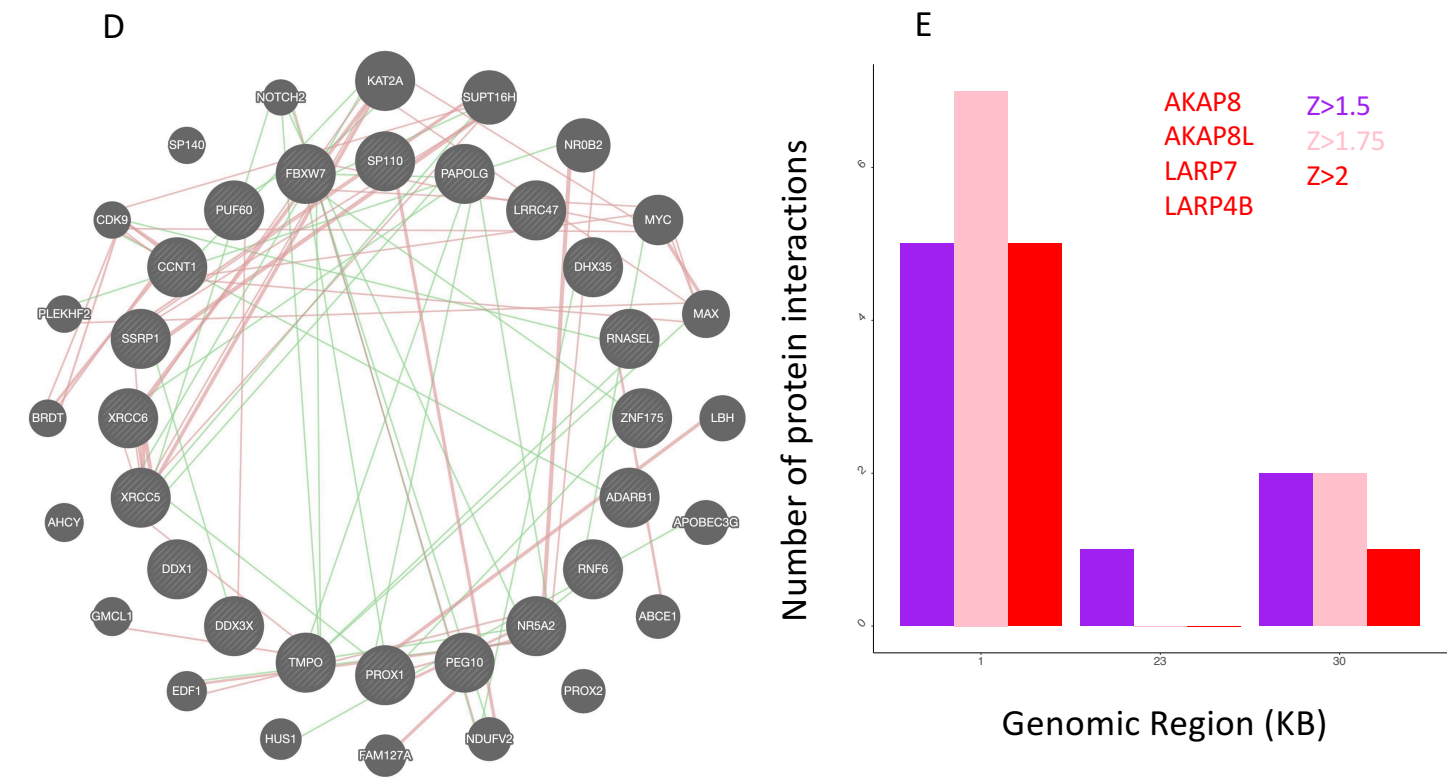

Source: https://www.biorxiv.org/content/10.1101/2020.03.28.013789v3.full.pdf
