# Supplementary material for: Structural analysis of SARS-CoV-2 genome and predictions of the human interactome
Source: bioRxiv or medRxiv preprint supplement (doi:10.1101/2020.03.28.013789), 2020-07-24
Supplement: Supplementary file [file media-4.pdf]

Structural Variability

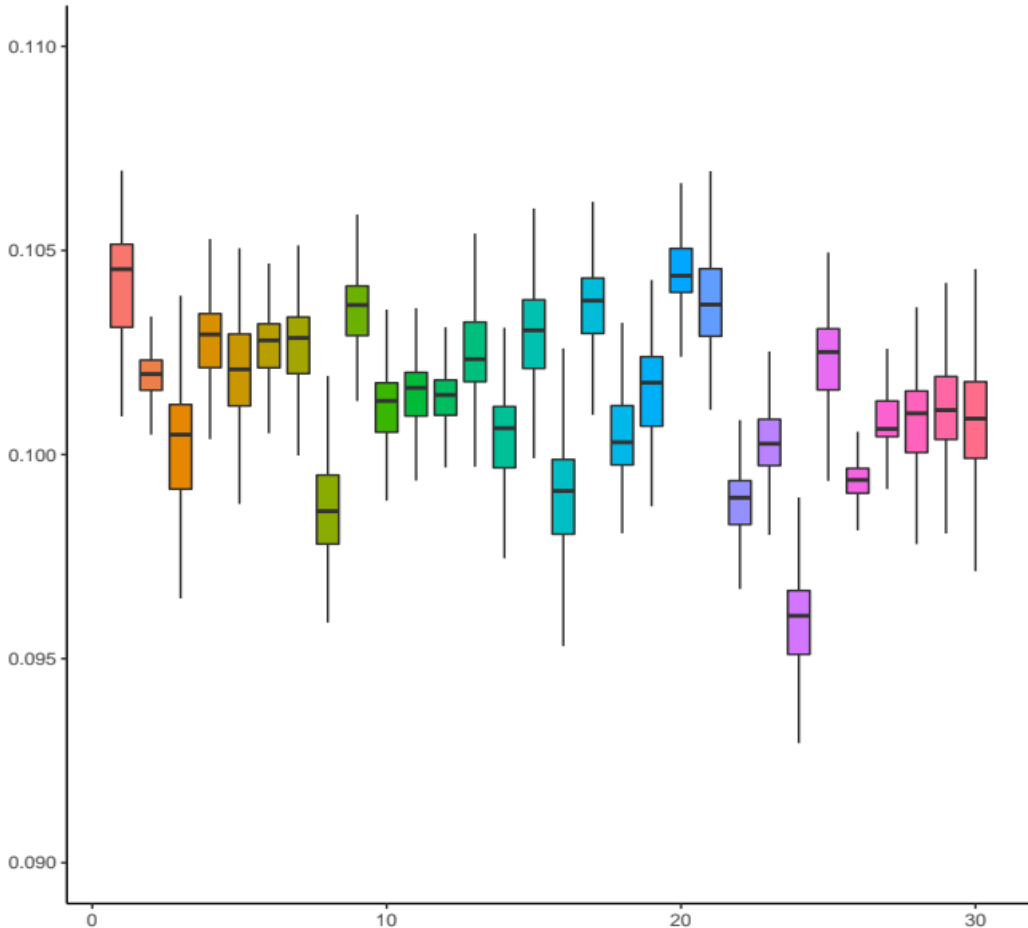

Genomic Region (KB)
